# Supplementary material for: Responses of dissolved organic carbon to freeze–thaw cycles associated with the changes in microbial activity and soil structure
Source: Copernicus journal article supplement (doi:10.5194/tc-17-3101-2023), 2023-07-31
Supplement: Supplementary file 1 [file tc-17-3101-2023-supplement.pdf]

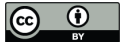

*Supplement of*

## **Responses of dissolved organic carbon to freeze–thaw cycles associated with the changes in microbial activity and soil structure**

**You Jin Kim et al.**

*Correspondence to:* Ji Young Jung (jyjung@kopri.re.kr)

The copyright of individual parts of the supplement might differ from the article licence.

**Table S1: Basic characteristics of the organic soil collected from the field site of Council, Alaska**

| Soil texture |       |       | BD                    | VWC                                 | Total C                   | Total N | DOC                        | TDN    | SUVA <sub>254</sub>                   | A <sub>254</sub> /A <sub>365</sub> |
|--------------|-------|-------|-----------------------|-------------------------------------|---------------------------|---------|----------------------------|--------|---------------------------------------|------------------------------------|
| Sand         | Silt  | Clay  |                       |                                     |                           |         |                            |        |                                       |                                    |
| (% w/w)      |       |       | (g cm <sup>-3</sup> ) | (cm <sup>3</sup> cm <sup>-3</sup> ) | (g kg <sup>-1</sup> soil) |         | (mg kg <sup>-1</sup> soil) |        | (L mg <sup>-1</sup> m <sup>-1</sup> ) |                                    |
| 34.4         | 57.4  | 8.3   | 0.72                  | 0.49                                | 259.2                     | 11.4    | 688.63                     | 39.62  | 1.77                                  | 4.28                               |
| (3.4)        | (3.0) | (0.7) | (0.01)                | (0.04)                              | (21.8)                    | (1.2)   | (50.36)                    | (2.59) | (0.14)                                | (0.11)                             |

Note: The numbers in parentheses are standard errors (n=3).

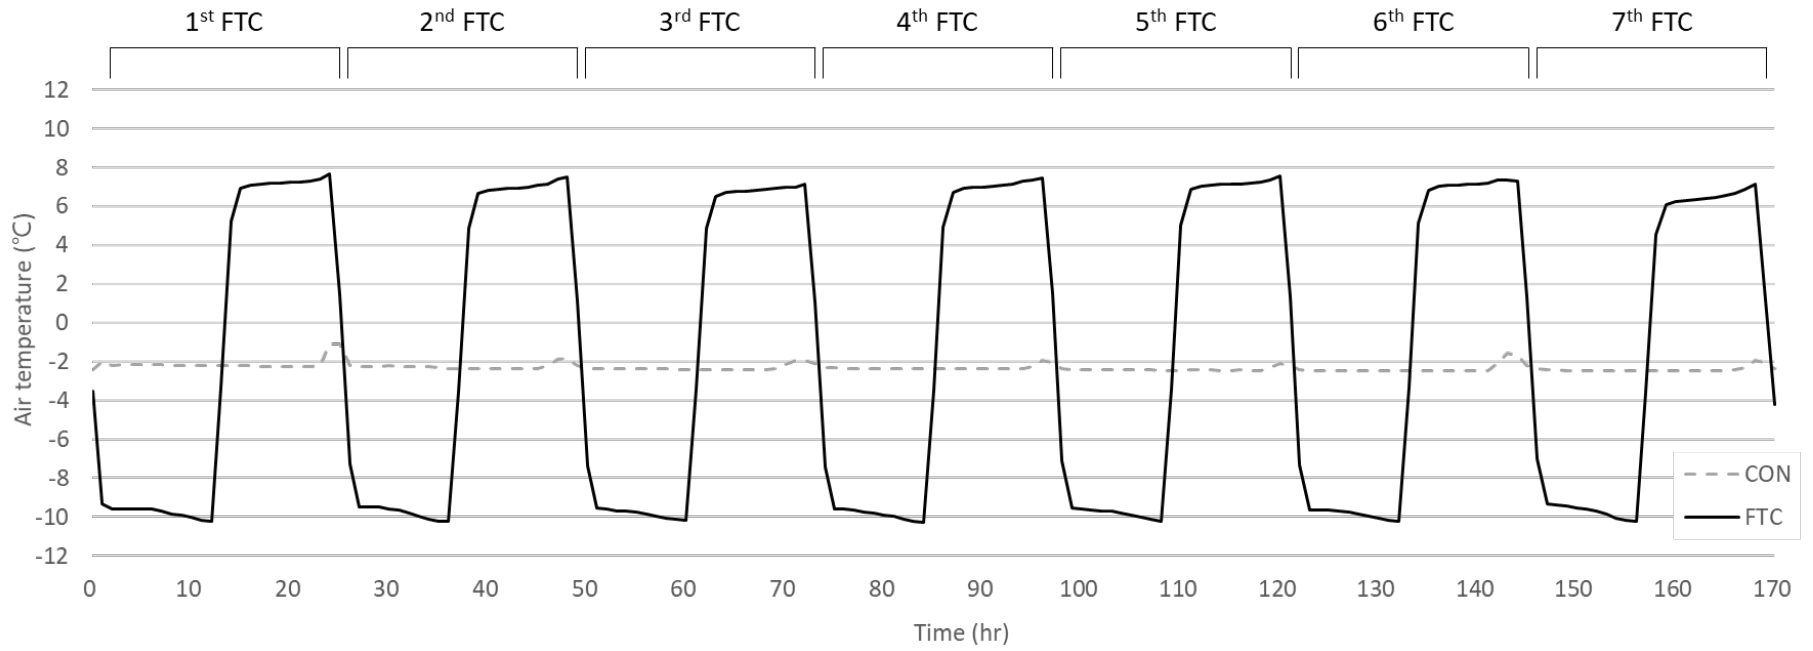

Figure S1. Air temperature during the freeze-thaw cycles (FTCs).

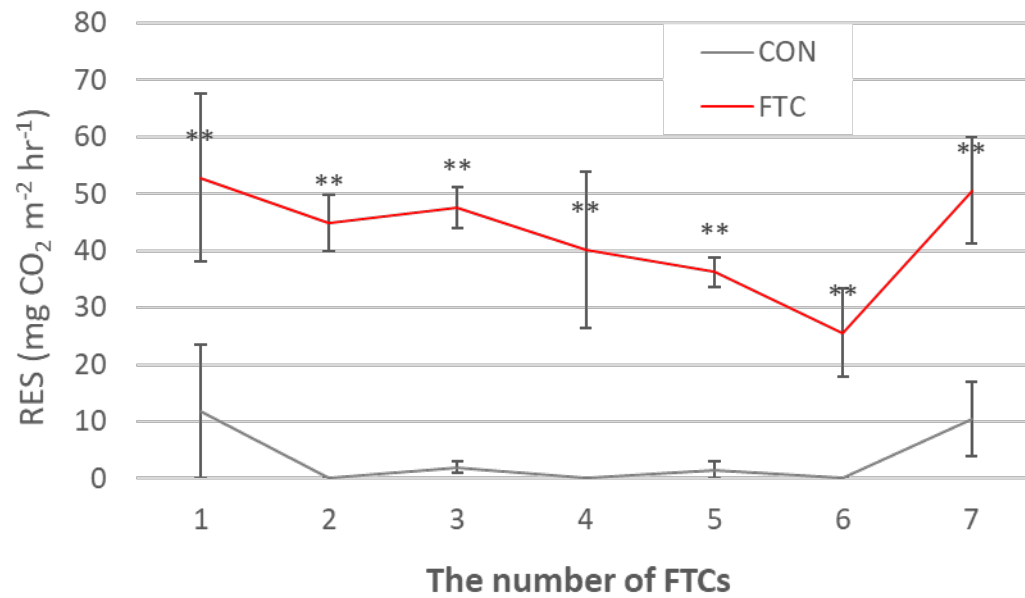

Figure S2: Temporal changes in soil respiration (RES) in the FTC and CON soils. The asterisks \*\* and \* indicate significant differences between treatments at the  $p < 0.05$  and  $p < 0.10$  levels, respectively. The vertical lines represent standard errors (n=3)

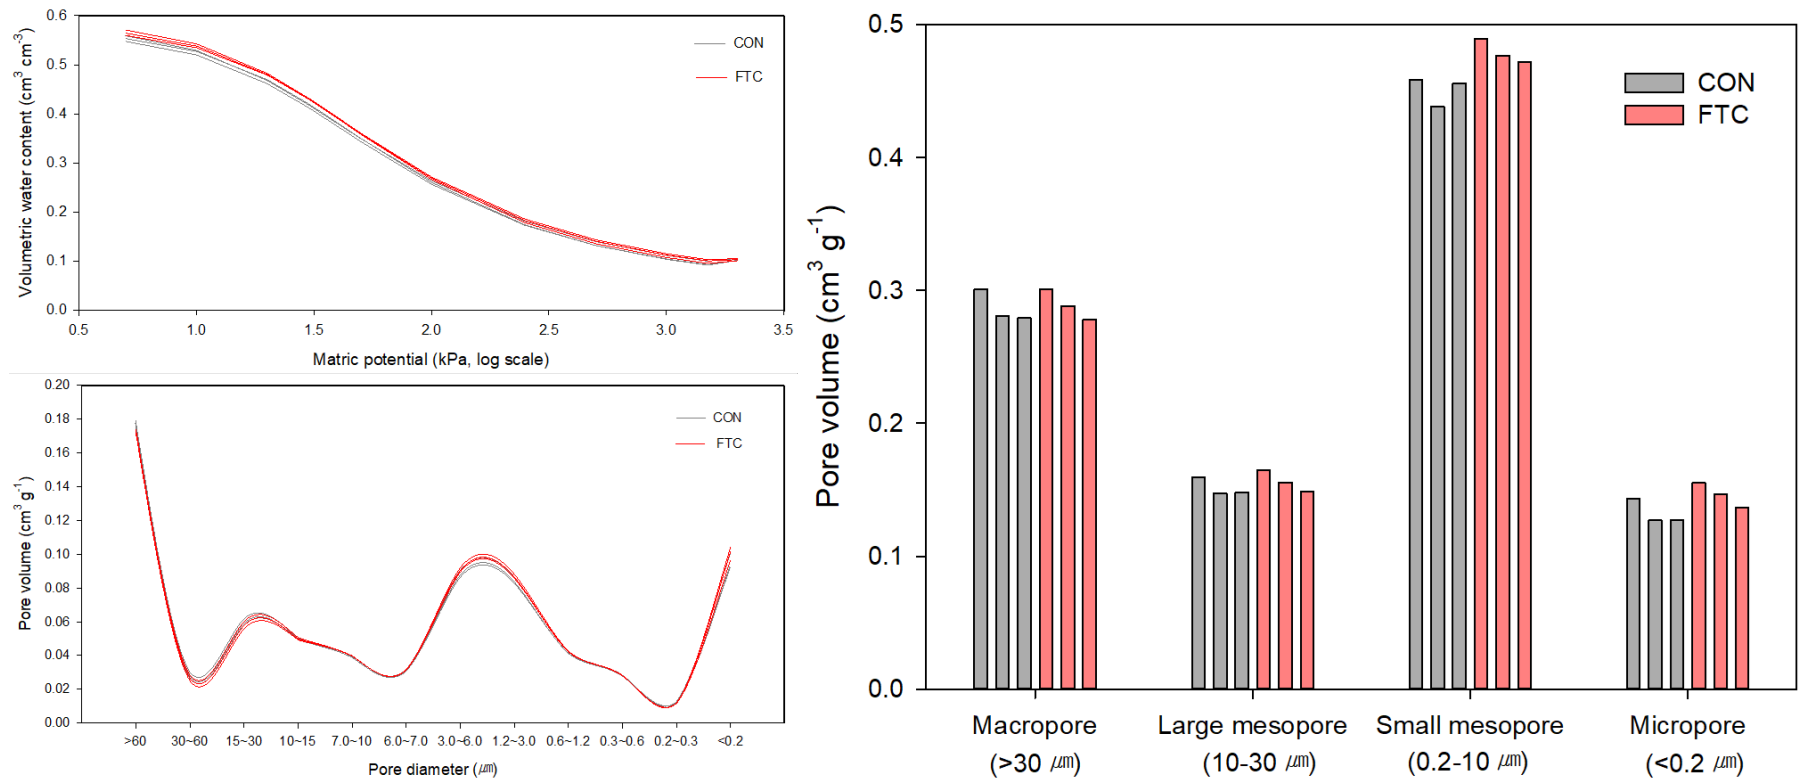

**Figure S3. Water release curves and pore size distribution in the FTC and CON soils.**
